# Supplementary material
Source: PubMed Central journal article supplement (PMC3119749)
Supplement: NIHMS294733-supplement-1.pdf [file NIHMS294733-supplement-1.pdf]

# Figure S1

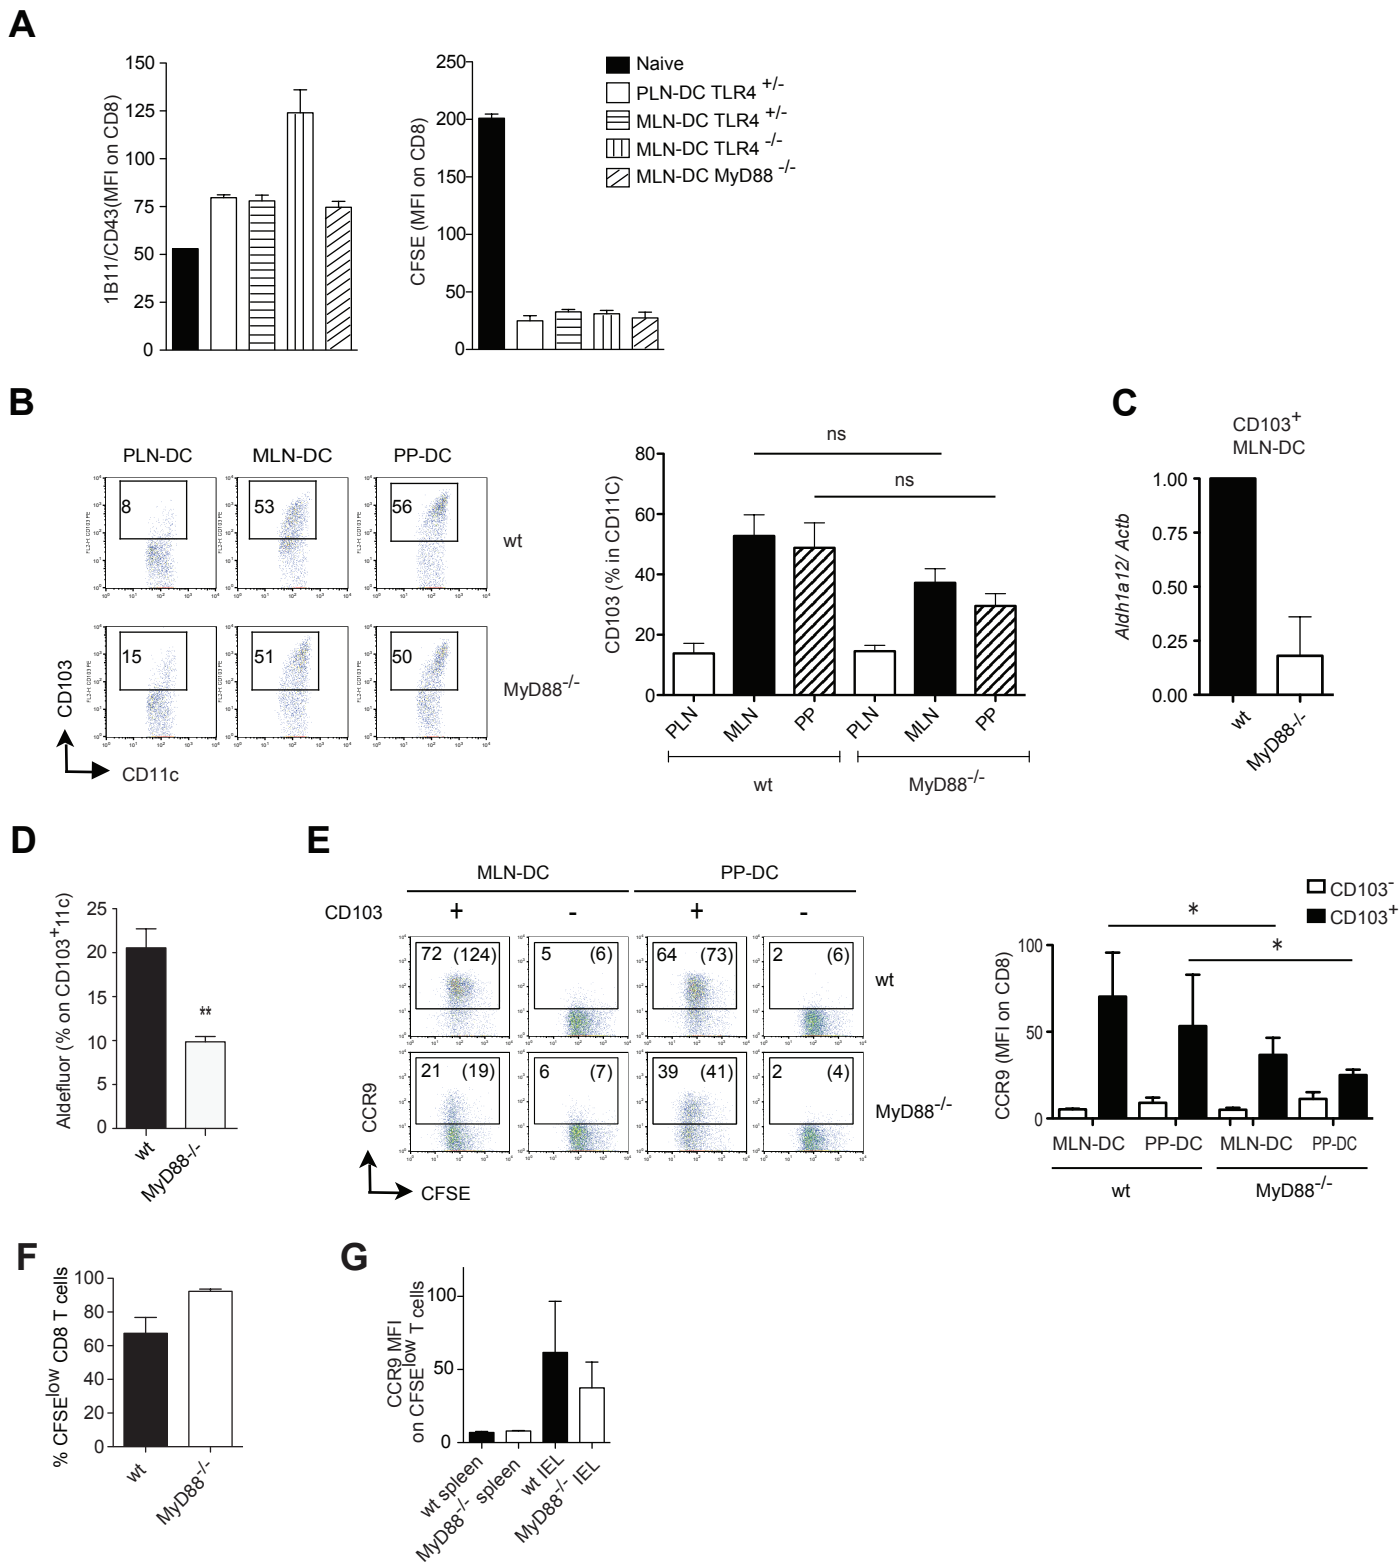

**Figure S1, related to Figure 1.** (A) Expression of 1B11/CD43 (marker of effector CD8 T cells) and CFSE dilution on CD8 T cells activated with TLR4<sup>+/+</sup>, TLR4<sup>-/-</sup> or MyD88<sup>-/-</sup> DC (triplicate). Naïve T cells are shown for comparison. (B) DC were isolated from wild type or MyD88<sup>-/-</sup> mice and analyzed for the percentages of CD103<sup>+</sup> cells among CD11c<sup>+</sup> DC (n = 7). (C) *Aldh1a2* mRNA (encoding Raldh2) was determined by TaqMan in sorted CD11c<sup>+</sup>CD103<sup>+</sup> MLN-DC from wild type or MyD88<sup>-/-</sup> mice (n=2). (D) Raldh activity (aldefluor staining) in CD11c<sup>+</sup>CD103<sup>+</sup> MLN-DC from untreated (non-Flt3L DC expanded) wild type or MyD88<sup>-/-</sup> mice (n=8-10). (E) Naïve CD8 T cells were activated with sorted CD11c<sup>+</sup>CD103<sup>+</sup> or CD11c<sup>+</sup>CD103<sup>-</sup> MLN-DC from wild type or MyD88<sup>-/-</sup> mice and then analyzed for their expression of CCR9 (n=4). (F, G) Wild type or MyD88<sup>-/-</sup> mice (Thy1.2<sup>+</sup>) were adoptively transferred with wild type CFSE-labeled OT-I CD8 T cells (Thy1.1<sup>+</sup>) and then immunized i.p. with ovalbumin plus Alum. Four days later the transferred Thy1.1<sup>+</sup> CD8 T cells were analyzed for their proliferation (CFSE dilution) in MLN (F) and their CCR9 expression in the small bowel intraepithelial lymphocyte compartment (IEL) and the spleen (G) (n=3). Graphs show mean ± SEM. \*p<0.05, \*\*p<0.01

# Figure S2

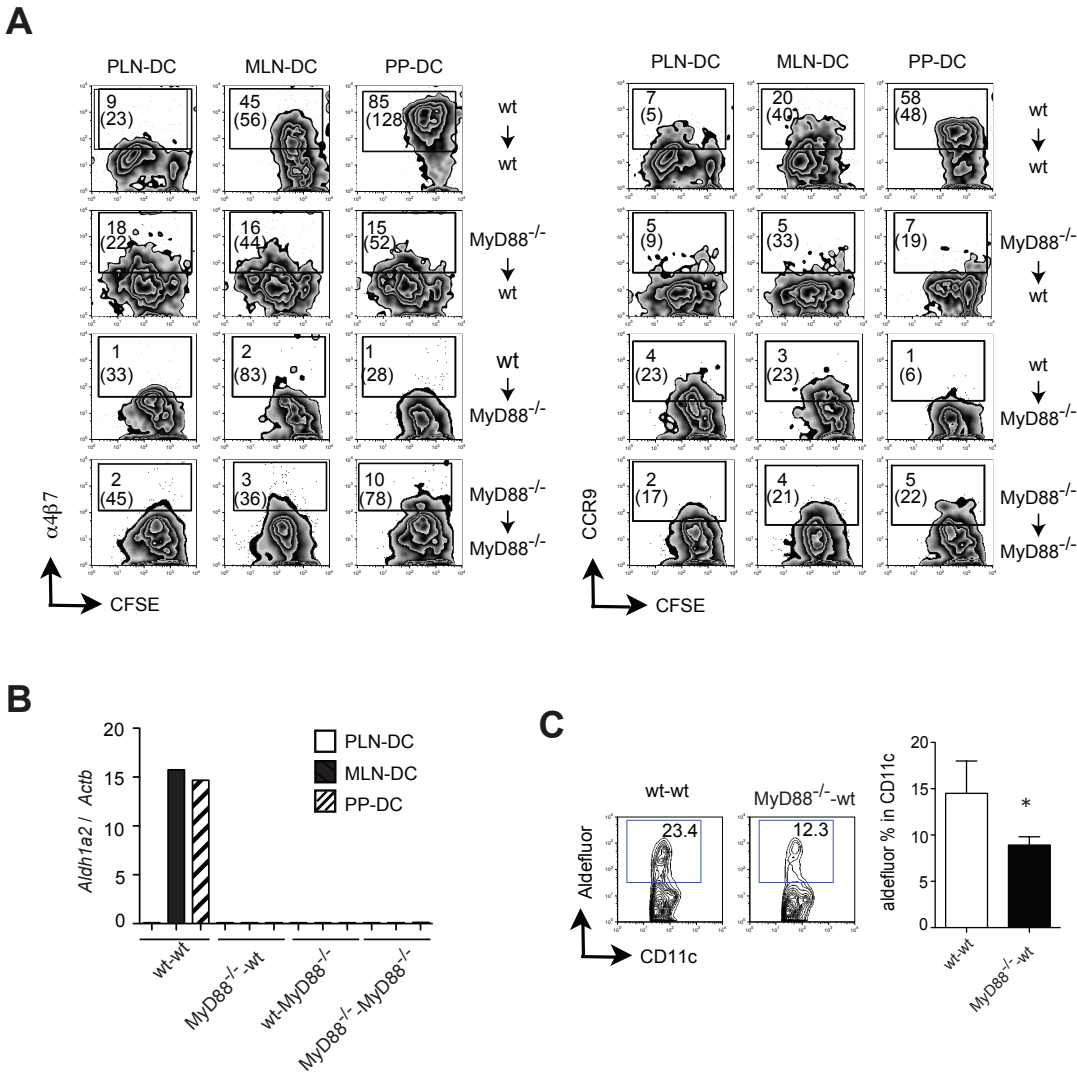

**Figure S2, related to Figure 2.** (A) Flow cytometry plots show  $\alpha 4\beta 7$  and CCR9 staining on CD8 T cells activated by DC from bone marrow (BM) chimeras in which BM from either wild type or MyD88<sup>-/-</sup> donors was transplanted into irradiated wild type or MyD88<sup>-/-</sup> recipient mice. (B) *Aldh1a2* mRNA expression in DC from BM chimeras. Graph representative of two experiments with similar results. (C) MLN-DC from BM chimeras were analyzed for their Raldh activity (aldefluor assay) (n=5). Graphs show mean  $\pm$  SEM. \*p<0.05

# Figure S3

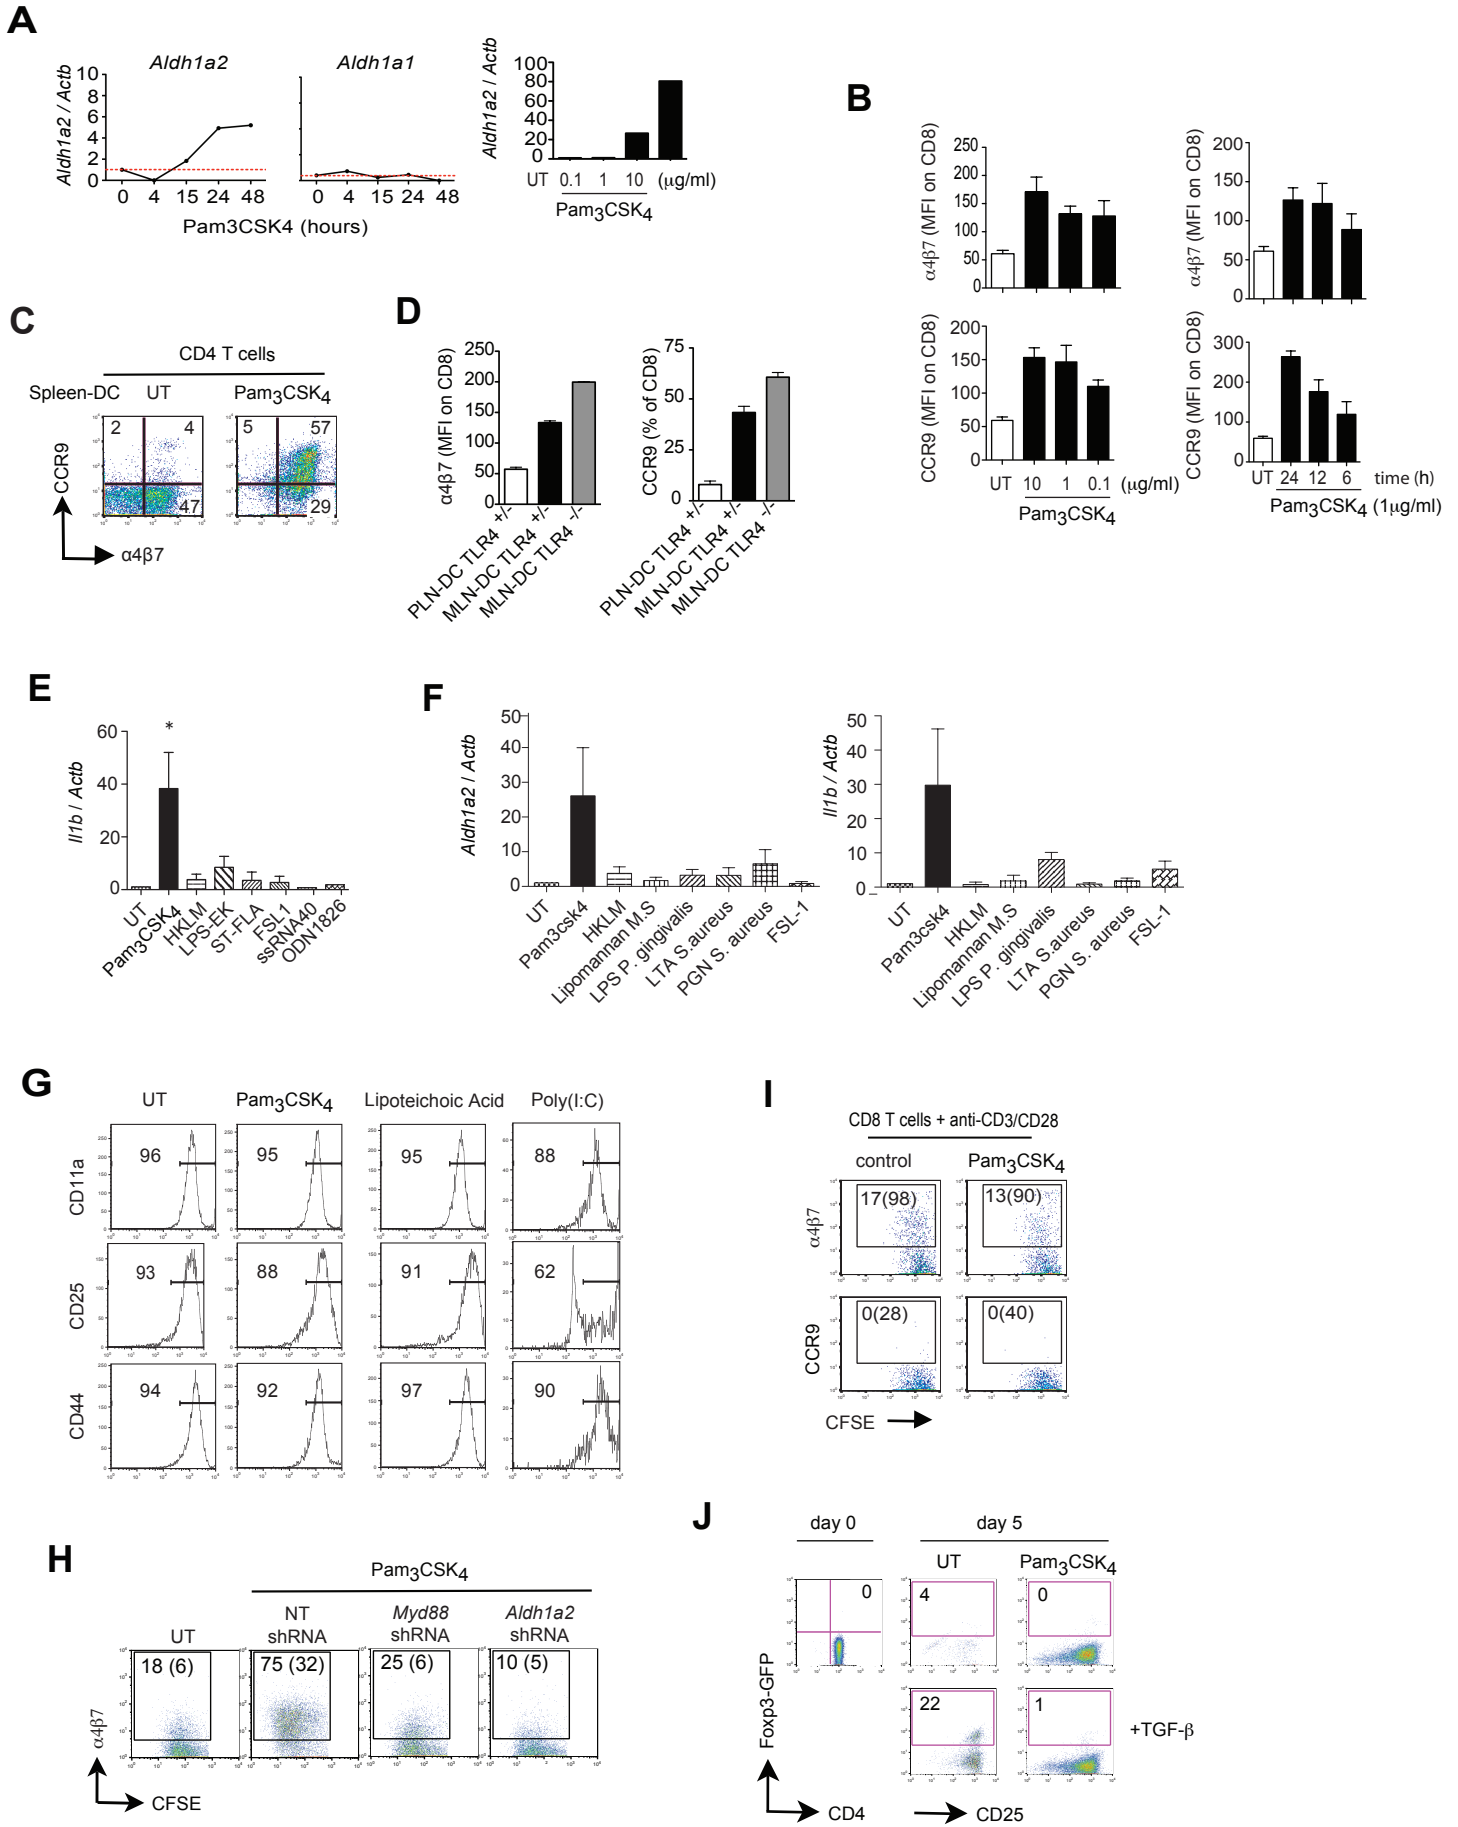

## Figure S3 (Legend)

**Figure S3, related to Fig. 3.** (A) Kinetics for *Aldh1a2* and *Aldh1a1* mRNA expression (TaqMan) and dose-response curve for *Aldh1a2* mRNA induction in Pam<sub>3</sub>CSK<sub>4</sub>-treated spleen-DC. Representative of two experiments with similar results. (B) Spleen-DC were treated for 24 h with the indicated concentrations of Pam<sub>3</sub>CSK<sub>4</sub> (left panels) or with 1 μg/ml Pam<sub>3</sub>CSK<sub>4</sub> for the indicated times (right panels) and then used to activate naïve CD8 T cells. Four days later the activated T cells were analyzed for their expression of α4β7 and CCR9. (C) Flow cytometry plots showing α4β7 and CCR9 expression on OT2 CD4 T cells activated with Spleen-DC pre-treated or not with Pam<sub>3</sub>CSK<sub>4</sub>. (D) Expression of α4β7 and CCR9 on CD8 T cells activated with DC from TLR4<sup>-/-</sup> or TLR4<sup>+/-</sup> mice (as controls). Results show one experiment in triplicate. (E) *Il1b* mRNA (encoding IL-1β) expression in Spleen-DC untreated (UT) or pre-incubated for 24 h in the presence of the indicated TLR agonists (n=2-6). (F) Spleen-DC were untreated (UT) or pre-incubated for 24 h in the presence of the indicated TLR1/2 or TLR2/6 agonists and then analyzed for their expression of *Aldh1a2* and *Il1b* mRNA (n=2-6). (G) Spleen-DC were untreated (UT) or pre-incubated for 24 h with the indicated TLR agonists and then used to activate naïve CD8 T cells. Four days later the activated T cells were analyzed for their expression of CD11a/LFA-1, CD25 and CD44. Numbers in FACS plots indicate % of positive cells. (H) Bone marrow-derived DC were transduced with lentiviruses codifying for short hairpin RNA (shRNA) targeting *Myd88*, *Aldh1a2* or a non-targeting (NT) sequence and then were pretreated with Pam<sub>3</sub>CSK<sub>4</sub> for 24h. After that, DC were used to activate CFSE-labeled naïve CD8 T cells. 4 days later CD8 T cells were analyzed for α4β7 expression. Numbers indicate percentage of positive cells and in parenthesis MFI of total cells. (I) Flow cytometry plots show α4β7 and CCR9 expression on CD8 T cells activated with plate-bound anti-CD3 plus anti-CD28 antibodies (without DC) and supplemented with Pam<sub>3</sub>CSK<sub>4</sub>. (J) Flow cytometry plots showing Foxp3/GFP or Foxp3 staining in OT-II/Foxp3-GFP or OT-II/RAG2<sup>-/-</sup> splenocytes, respectively, before or after 5 days of culture with peptide-pulsed Spleen-DC pre-treated or not with 1 μg/ml Pam<sub>3</sub>CSK<sub>4</sub> (right). Graphs show mean ± SEM. \*p<0.05.

# Figure S4

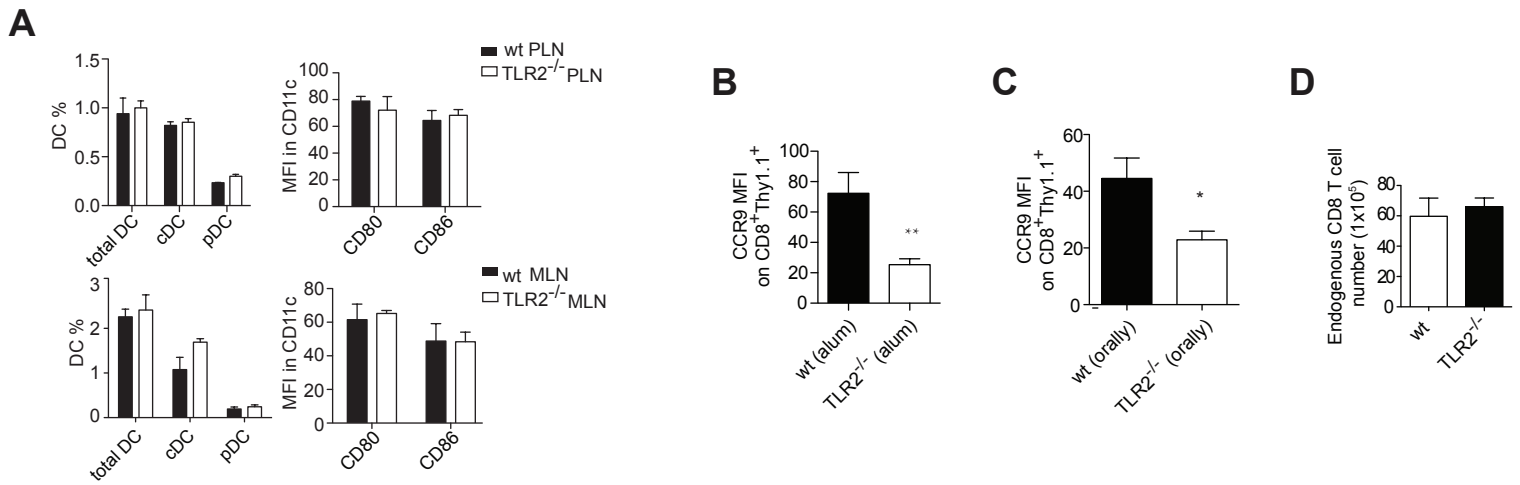

**Figure S4, related to Fig. 4.** (A) Comparison between TLR2<sup>-/-</sup> and wild type DC from PLN and MLN. (B, C) Wild type or TLR2<sup>-/-</sup> mice (Thy1.2<sup>+</sup>) were adoptively transferred with wild type CFSE-labeled OT-I CD8 T cells (Thy1.1<sup>+</sup>) and then immunized i.p. with OVA plus Alum (B) or with OVA orally (C). Four days later the mice were analyzed for the expression of CCR9 on activated Thy1.1<sup>+</sup> CD8 T cells in MLN (n=4). (D). Endogenous CD8 T cell number in the small bowel LP of wild type or TLR2<sup>-/-</sup> mice (n=2). Graphs show mean ± SEM. \*p<0.05, \*\*\*p<0.001

# Figure S5

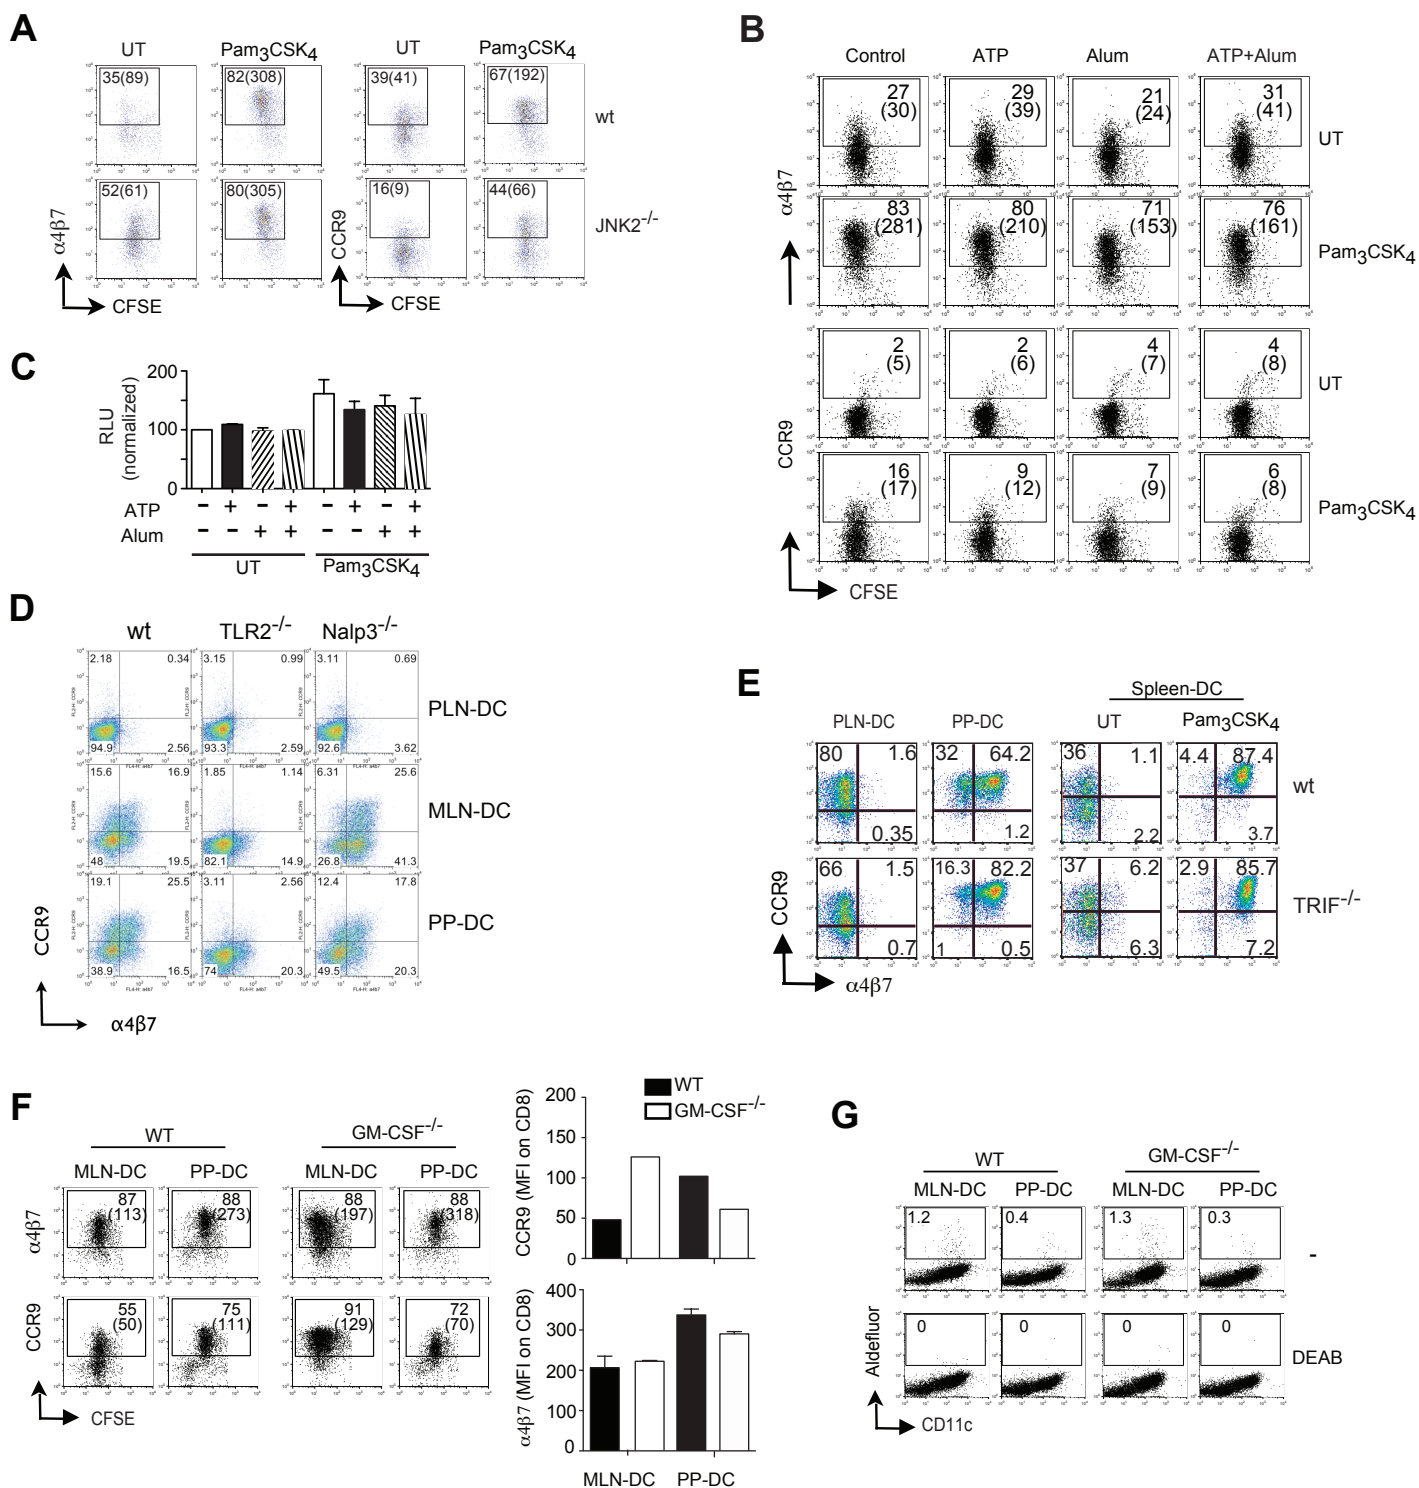

**Figure S5, related to Figure 5.** (A) Flow cytometry plots show  $\alpha 4\beta 7$  and CCR9 expression on CD8 T cells activated with Spleen-DC from wild type or JNK2<sup>-/-</sup> mice untreated (UT) or pre-treated with Pam<sub>3</sub>CSK<sub>4</sub>. (B)  $\alpha 4\beta 7$  and CCR9 expression on CD8 T cells activated with Spleen-DC untreated (UT) or pre-treated with Pam<sub>3</sub>CSK<sub>4</sub> and either in the presence or the absence of ATP and/or Alum. (C) Relative Luciferase Units (RLU) in Spleen-DC from DR5-luciferase mice UT or pre-treated Pam<sub>3</sub>CSK<sub>4</sub> and either in the presence or the absence of ATP and/or Alum (n=2). (D) Naïve CD8 T cells were activated with DC from wild type, TLR2<sup>-/-</sup> or Nalp3<sup>-/-</sup> mice and then analyzed for their expression of  $\alpha 4\beta 7$  and CCR9. Representative of two experiments with similar results. (E) Naïve CD8 T cells were activated with DC from wild type or TRIF<sup>-/-</sup> mice and then analyzed for their expression of  $\alpha 4\beta 7$  and CCR9. Spleen-DC were UT or pre-treated with Pam<sub>3</sub>CSK<sub>4</sub>. Representative of two experiments with similar results. (F)  $\alpha 4\beta 7$  and CCR9 expression on CD8 T cells activated with MLN-DC or PP-DC from wild type or GM-CSF<sup>-/-</sup> mice (n=3). Results were normalized respect to wild type MLN-DC. (G) Raldh activity in DC from wild type or GM-CSF<sup>-/-</sup> mice. Representative of three experiments with similar results. Graphs show mean  $\pm$  SEM.
